# Supplementary material
Source: publisher figshare collection journal article supplement (https://adisjournals.figshare.com/ndownloader/files/38785239)

### KEY QUESTION

Concerns of increased postoperative oozing using a new generation prosthesis for frozen elephant trunk technique

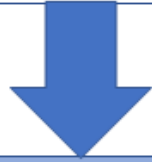

### KEY FINDINGS

Multi-centre study shows no increased risk of bleeding. Re-thoracotomy occurred in 4.5%.

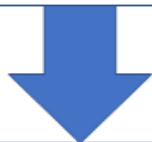

### TAKE HOME MESSAGE

Our data compare favourably to data on previous prosthesis generations. Its use is safe and effective in treating complex aortic disease.

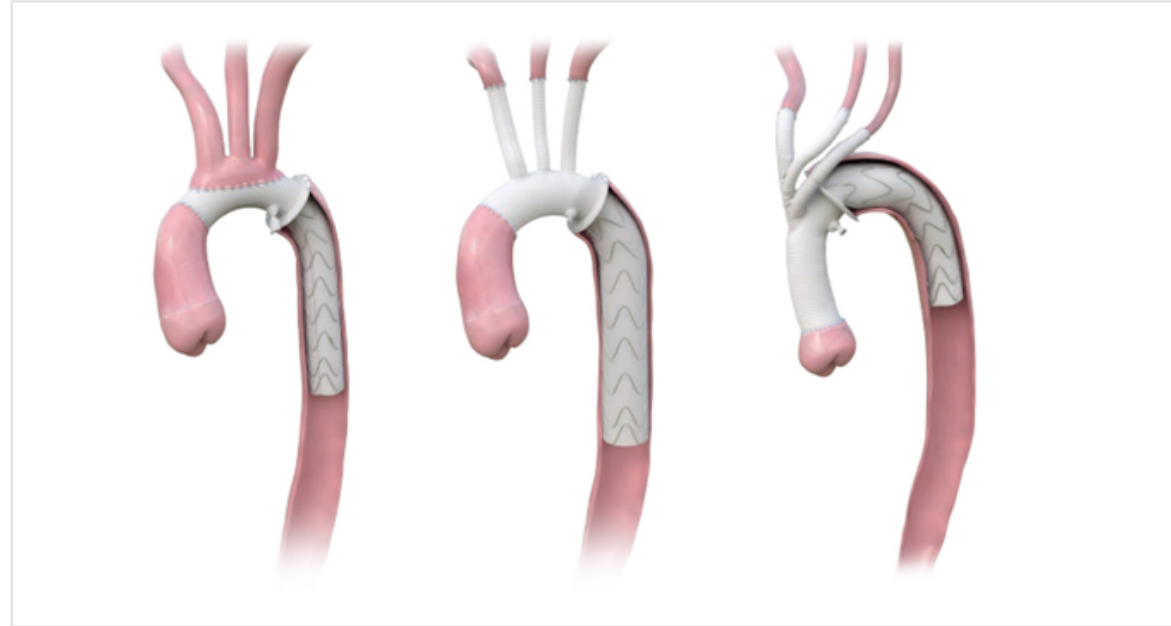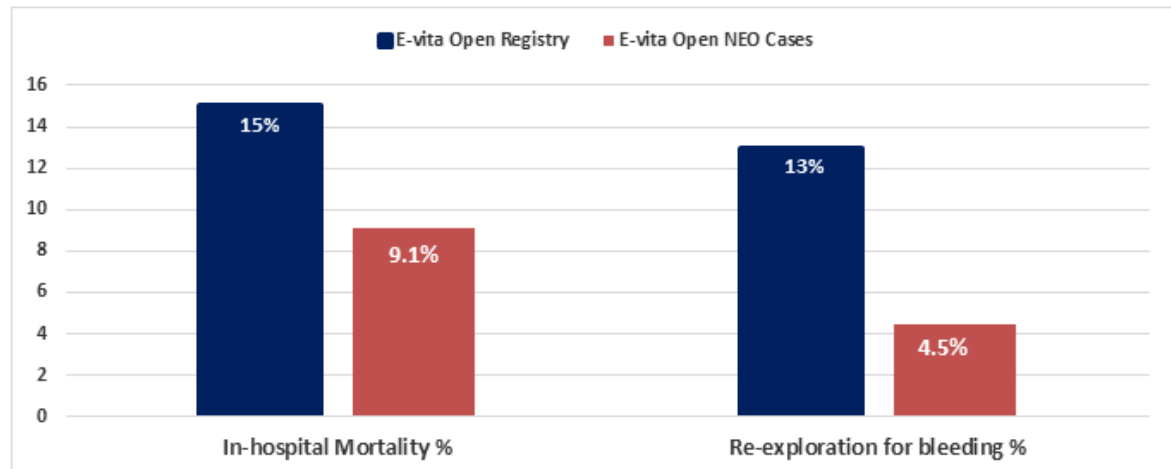

Supplement: Supplementary file 1 [file 38785239]
